# Supplementary material
Source: PubMed Central journal article supplement (PMC7671637)
Supplement: ocaa206_supplementary_data.pdf [file ocaa206_supplementary_data.pdf]

**Supplementary Table 1.** Survey of Earned Doctorates (SED) codes used to identify biomedical informatics-related doctoral graduates

| <b>Biomedical informatics-related training category</b>                                  | <b>SED Codes</b>                                                                                                                                                                                                                                                                                                                                                                                                                                                                                                                                                                                                                                                                                                                                                                                                                                                                                                                                               | <b>No. of graduates (%)</b> |
|------------------------------------------------------------------------------------------|----------------------------------------------------------------------------------------------------------------------------------------------------------------------------------------------------------------------------------------------------------------------------------------------------------------------------------------------------------------------------------------------------------------------------------------------------------------------------------------------------------------------------------------------------------------------------------------------------------------------------------------------------------------------------------------------------------------------------------------------------------------------------------------------------------------------------------------------------------------------------------------------------------------------------------------------------------------|-----------------------------|
| Bioinformatics is primary field of study regardless of the presence of a secondary field | Bioinformatics (102)                                                                                                                                                                                                                                                                                                                                                                                                                                                                                                                                                                                                                                                                                                                                                                                                                                                                                                                                           | 1,471 (60.6)                |
| Computer science field of study is primary and health-related field is secondary         | Computational Biology (104)<br>Biology/Biomedical Sciences, General (198)<br>Biology/Biomedical Sciences, Other (199)<br>Computer Engineering (321)<br>Electrical, Electronics & Communications Engineering (324)<br>Computer Science (400)<br>Information Science and Systems (410)<br>Computer & Information Science, Other (419)<br>Computing Theory & Practice (460)<br>Library Sciences (972)                                                                                                                                                                                                                                                                                                                                                                                                                                                                                                                                                             | 619 (25.5)                  |
| Health-related field of study is primary and computer science field is secondary         | Biomedical Sciences (103)<br>Biophysics (105)<br>Immunology (151)<br>Microbiology (157)<br>Neurosciences and neurobiology (160)<br>Nutrition sciences (163)<br>Environmental toxicology (Biological science) (167)<br>Virology (168)<br>Toxicology (169)<br>Genetics/genomics, human and animal (170)<br>Pathology, human and animal (175)<br>Pharmacology, human and animal (180)<br>Physiology, human and animal (185)<br>Speech-language pathology and audiology (200)<br>Oral biology/oral pathology (207)<br>Environmental Health (210)<br>Health systems/services administration (212)<br>Public Health (215)<br>Health Policy Analysis (217)<br>Epidemiology (220)<br>Kinesiology/exercise physiology (222)<br>Gerontology (Health science) (227)<br>Nursing Science (230)<br>Pharmaceutical Sciences (240)<br>Rehabilitation/therapeutic services (245)<br>Veterinary sciences (250)<br>Health sciences, general (298)<br>Health sciences, other (299) | 336 (13.9)                  |
